# Supplementary material for: An ensemble random forest model for seismic energy forecasting
Source: Copernicus journal article supplement (doi:10.5194/nhess-25-3713-2025), 2025-10-01
Supplement: Supplementary file 1 [file nhess-25-3713-2025-supplement.pdf]

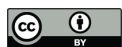

*Supplement of*

## **An ensemble random forest model for seismic energy forecasting**

**Sukh Sagar Shukla et al.**

*Correspondence to:* Sukh Sagar Shukla (d22178@students.iitmandi.ac.in)

The copyright of individual parts of the supplement might differ from the article licence.

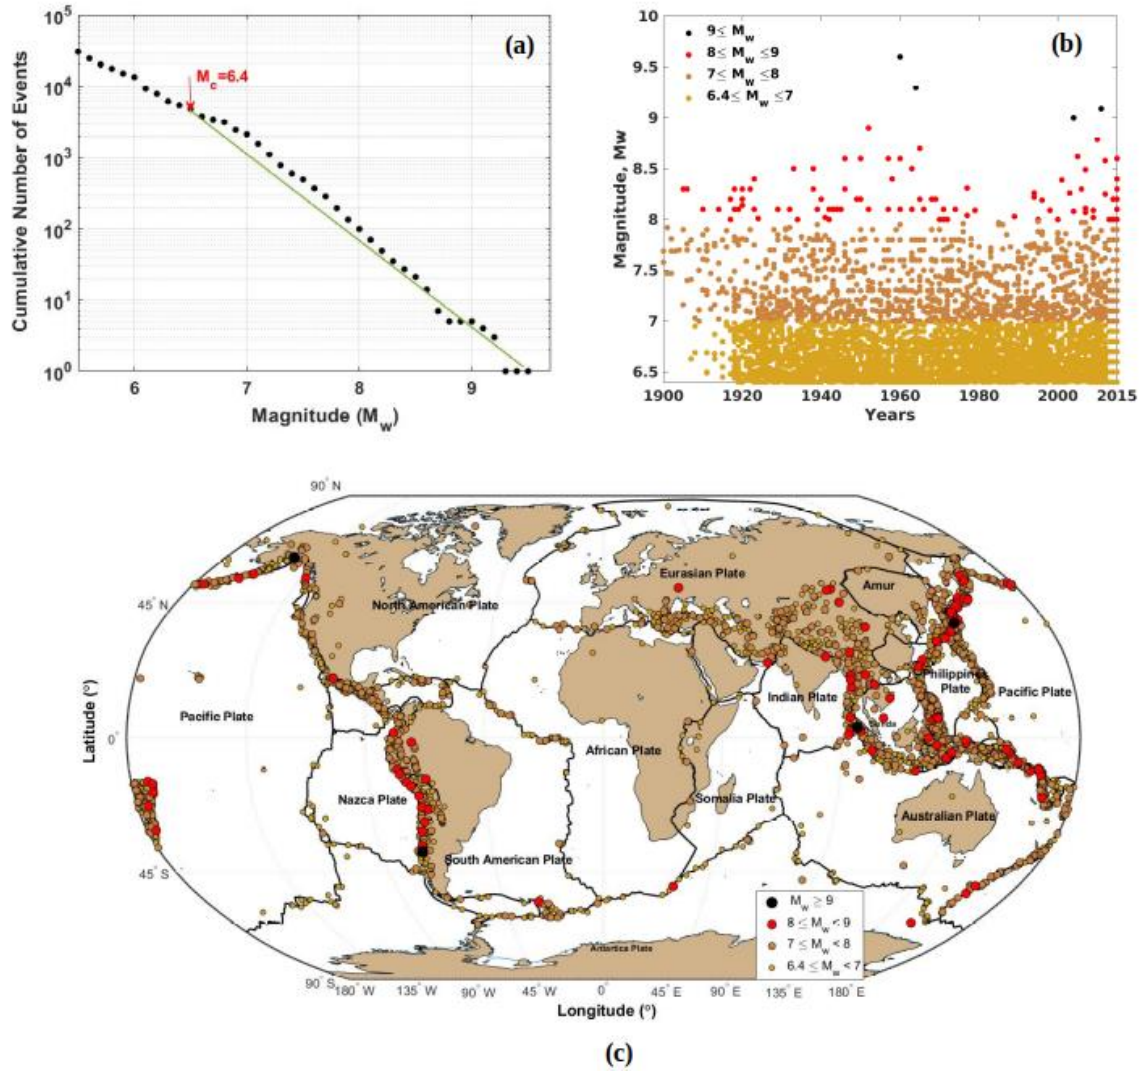

Fig S1: (a) Magnitude of completeness. (b) Magnitude distribution over years. (c) Global distribution of the events from the global earthquake catalogue considered in Raghukanth et al. (2017) adopted for testing the performance of the proposed approach in this work.

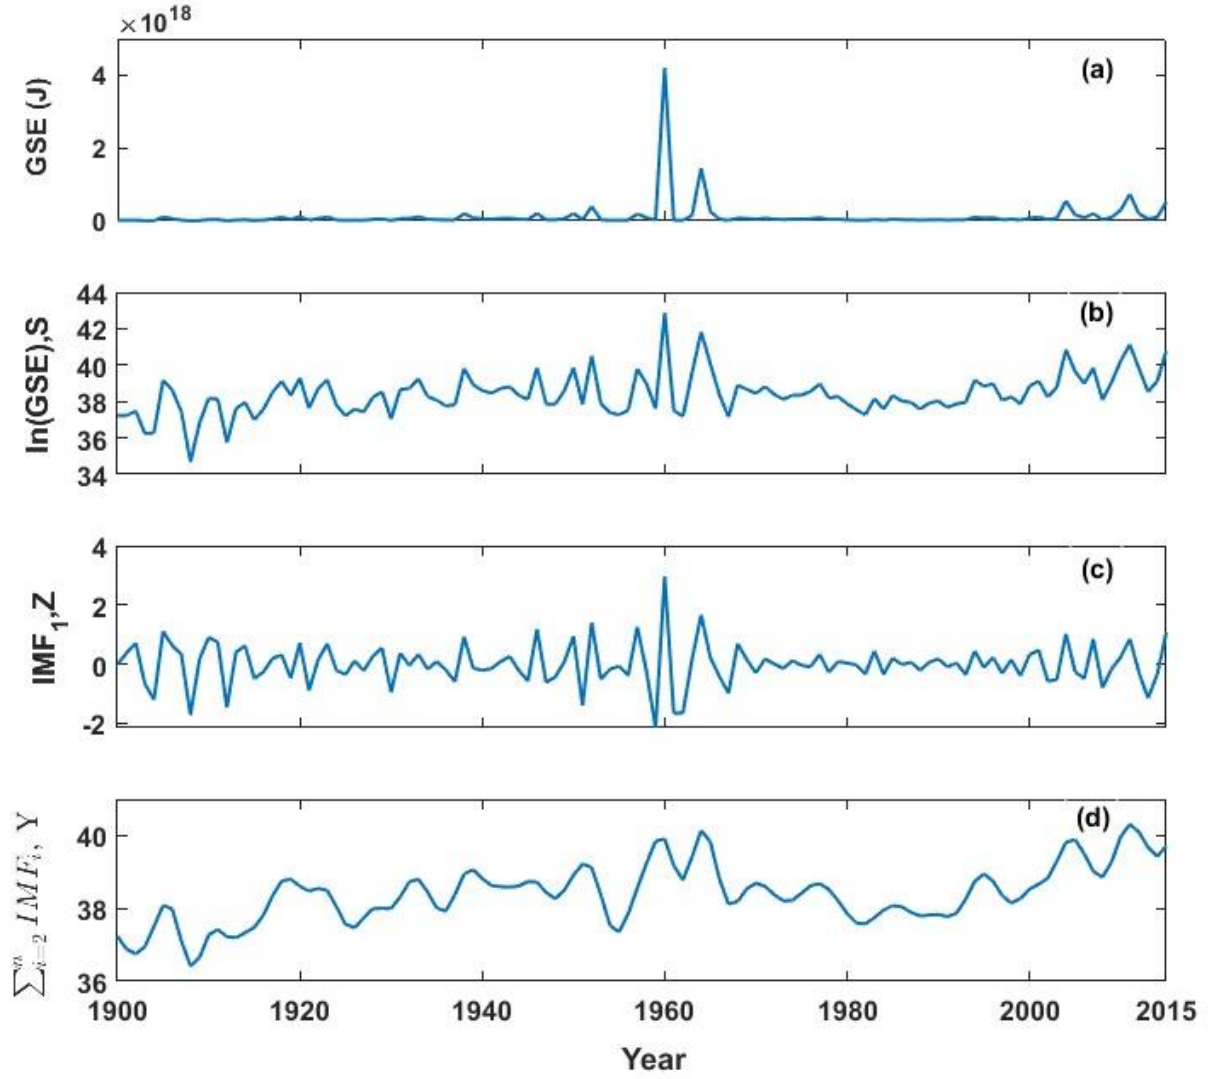

Figure S2: (a) Estimated Global seismic energy (J) time series from ISC gem catalogue used in developing the models (b) log scaled Global seismic energy time series ( $\ln(\text{GSE})$ ) (c) First intrinsic mode estimated from  $\ln(\text{GSE})$  by performing ensemble empirical mode decomposition (EEMD) (d) Sum of second to last intrinsic modes estimated from  $\ln(\text{GSE})$  by performing EEMD.
